# Supplementary material for: GC Insights: Space sector careers resources need a greater diversity of roles
Source: Copernicus journal article supplement (doi:10.5194/gc-2022-1), 2022-01-20

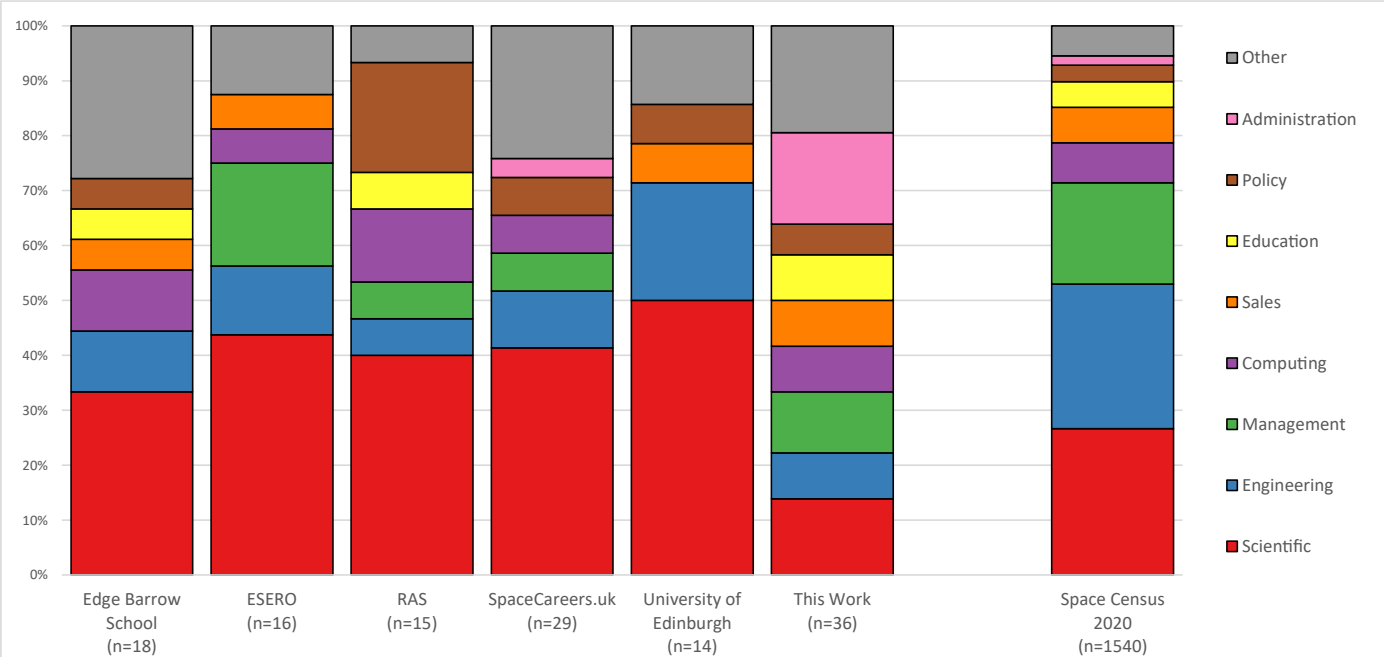

Supplement: Supplementary file [file gc-2022-1-AC1-supplement.pdf]
